# Supplementary material for: Comparison of two benthic assemblage sampling gears for use on intertidal oyster reefs in Louisiana
Source: PeerJ journal article supplement (doi:10.7717/peerj.19346), 2025-04-28
Supplement: Equation_S1.docx [file Equation_S1.docx]

Step 1:

Step 2:

Step 3:

Step 4:
