# Supplementary material for: Comparison of two benthic assemblage sampling gears for use on intertidal oyster reefs in Louisiana
Source: PeerJ journal article supplement (doi:10.7717/peerj.19346), 2025-04-28
Supplement: TableS1.docx [file TableS1.docx]

| Taxa | Trays | Suction samples |
| --- | --- | --- |
| Amphipoda Gammaridae | 1.32 | 0.056 |
| Amphipoda Corophiidae | 0.513 | 0.052 |
| *Ampelisca abdita* | - | 0.013 |
| *Mulinia lateralis* | 1.437 | 3.012 |
| *Mytilopsis leucophaeata* | - | 0.538 |
| *Ameritella mitchelli* | - | 0.039 |
| *Arcuatula papyria* | - | 0.148 |
| Diptera Chironomidae | 0.017 | - |
| Panopeidae spp | 167.04 | 12.231 |
| Callinectes spp | 325.747 | 12.587 |
| *Pachygrapsus gracilis* | 1.055 | - |
| *Opsanus beta* | 0.938 | 0.017 |
| *Ctenogobius boleosoma* | 4.353 | - |
| Pleuronectiformes | - | 0.716 |
| Gobiosoma spp | 82.891 | 0.937 |
| *Gobiesox strumosus* | 33.984 | - |
| *Myrophis punctatus* | 0.642 | 0.595 |
| *Hypsoblennius hentz* | 9.288 | - |
| *Hypsoblennius ionthas* | 42.487 | 0.959 |
| *Gobionellus oceanicus* | - | 0.069 |
| Isopoda Idoteidae | 0.005 | 0.004 |
| Isopoda Anthuridae | 0.011 | 0.013 |
| Isopoda Ancinidae | 0.013 | - |
| Nemertea | 0.009 | - |
| *Alitta succinea* | 0.898 | 0.13 |
| Palaemonetes spp | 106.48 | 0.165 |
| Alpheidae spp | 0.135 | - |
| *Penaeus aztecus* | 3.287 | 1.207 |
| *Penaeus setiferus* | 0.009 | 0.022 |
