# Supplementary material for: Comparison of two benthic assemblage sampling gears for use on intertidal oyster reefs in Louisiana
Source: PeerJ journal article supplement (doi:10.7717/peerj.19346), 2025-04-28
Supplement: TableS2.docx [file TableS2.docx]

| Water Column Variable | mean | SE | min | max | n |
| --- | --- | --- | --- | --- | --- |
| Depth (m) | 1.85 | 0.01 | 1.52 | 2.18 | 403 |
| Temperature (°C) | 29.15 | 0.04 | 28.14 | 31.56 | 384 |
| Salinity (PSU) | 5.96 | 0.06 | 4.20 | 10.04 | 384 |
| DO (mg/L) | 5.42 | 0.05 | 3.36 | 7.78 | 384 |
