# Supplementary material for: Comparison of two benthic assemblage sampling gears for use on intertidal oyster reefs in Louisiana
Source: PeerJ journal article supplement (doi:10.7717/peerj.19346), 2025-04-28
Supplement: TableS3.docx [file TableS3.docx]

|  | Trays | | | Suction samples | | |
| --- | --- | --- | --- | --- | --- | --- |
| Reef | 1 | 2 | 3 | 1 | 2 | 3 |
| Reef Characteristic | | | | | | |
| Reef Substrate (L) | | | | | | |
|  | 18.29 ± 3.36 | 28.57 ± 5.27 | 22.86 ± 2.72 | 18.29 ± 3.36 | 28.57 ± 5.27 | 22.86 ± 2.72 |
|  | 4 - 28 | 8 - 48 | 12 - 32 | 4 - 28 | 8 - 48 | 12 - 32 |
| Live Oyster Density | | | | | | |
|  | 0 ± 0 | 73.14 ± 21.20 | 45.71 ± 21.64 | 0 ± 0 | 73.14 ± 21.20 | 45.71 ± 21.64 |
|  | 0 - 0 | 0 - 144 | 0 - 128 | 0 - 0 | 0 - 144 | 0 - 128 |
| Cluster Volume (L) | | | | | | |
|  | 4.46 ± 0.60 | 17.71 ± 4.26 | 13.14 ± 3.67 | 4.46 ± 0.60 | 17.71 ± 4.26 | 13.14 ± 3.67 |
|  | 3.2 - 8 | 4 - 32 | 4 - 28 | 3.2 - 8 | 4 - 32 | 4 - 28 |
| Biodiversity metric | | | | | | |
| Taxa abundance | | | | | | |
|  | 1214.5 ± 159.41 | 2546.17 ± 882.26 | 1655.83 ± 215.24 | 38.17 ± 8.78 | 113.5 ± 28.41 | 72.33 ± 8.82 |
|  | 720 - 1840 | 1007 - 6901 | 1168 - 2578 | 17 - 69 | 22 - 204 | 52 - 113 |
| Taxa richness | | | | | | |
|  | 9.83 ± 0.6 | 12.17 ± 0.31 | 10.83 ± 0.48 | 5.83 ± 0.6 | 6.67 ± 1.12 | 8.17 ± 0.48 |
|  | 8 - 12 | 11 - 13 | 9 - 12 | 4 - 7 | 2 - 9 | 7 - 10 |
| Pielou's evenness | | | | | | |
|  | 0.7 ± 0.04 | 0.53 ± 0.04 | 0.59 ± 0.02 | 0.95 ± 0.03 | 0.85 ± 0.03 | 0.92 ± 0.02 |
|  | 0.52 - 0.85 | 0.35 - 0.6 | 0.54 - 0.7 | 0.82 - 1 | 0.72 - 0.9 | 0.82 - 0.98 |
| Shannon-Wiener diversity | | | | | | |
|  | 1.59 ± 0.07 | 1.33 ± 0.1 | 1.42 ± 0.08 | 1.65 ± 0.12 | 1.55 ± 0.22 | 1.92 ± 0.06 |
|  | 1.28 - 1.76 | 0.88 - 1.51 | 1.18 - 1.75 | 1.33 - 1.95 | 0.5 - 1.91 | 1.77 - 2.16 |
